# Supplementary material
Source: publisher figshare collection journal article supplement (https://gsajournals.figshare.com/articles/dataset/_/14773530)
Supplement: Supplementary file 1 [file 1]

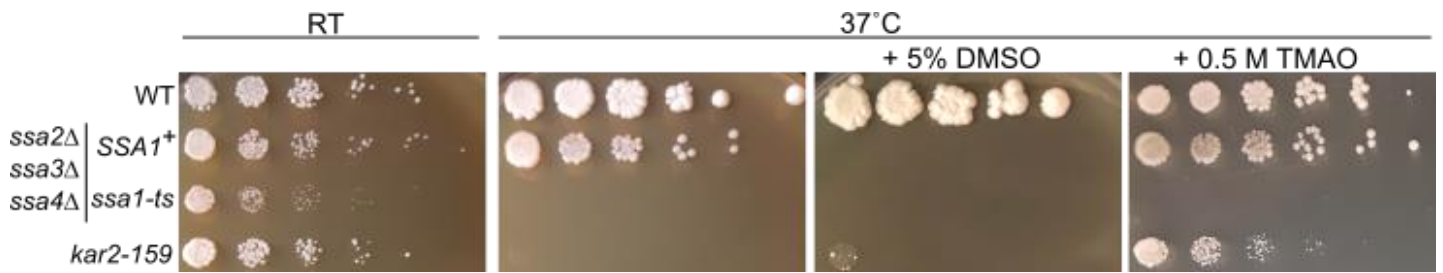

**Figure S7. DMSO or TMAO cannot replace cytosolic Hsp70 function.** Dilution series spotted on rich (YPD) medium with or without 5% DMSO or 0.5 M TMAO, indicated at the indicated temperatures. The *kar2-159* TS mutant is strain CBY07833 and its WT parent is BY4741. The other two strains, from a distinct strain background, have deletions of three of the four cytosolic SSA-family Hsp70 chaperones (*ssa2Δ ssa3Δ ssa4Δ*) and at the *SSA1* locus carry either a WT allele (“*SSA1+*”, strain ECY487) or a TS allele (“*ssa1-ts*”, strain ECY567).
