# Supplementary material
Source: publisher figshare collection journal article supplement (https://gsajournals.figshare.com/articles/dataset/_/14773530)
Supplement: Supplementary file 4 [file 1]

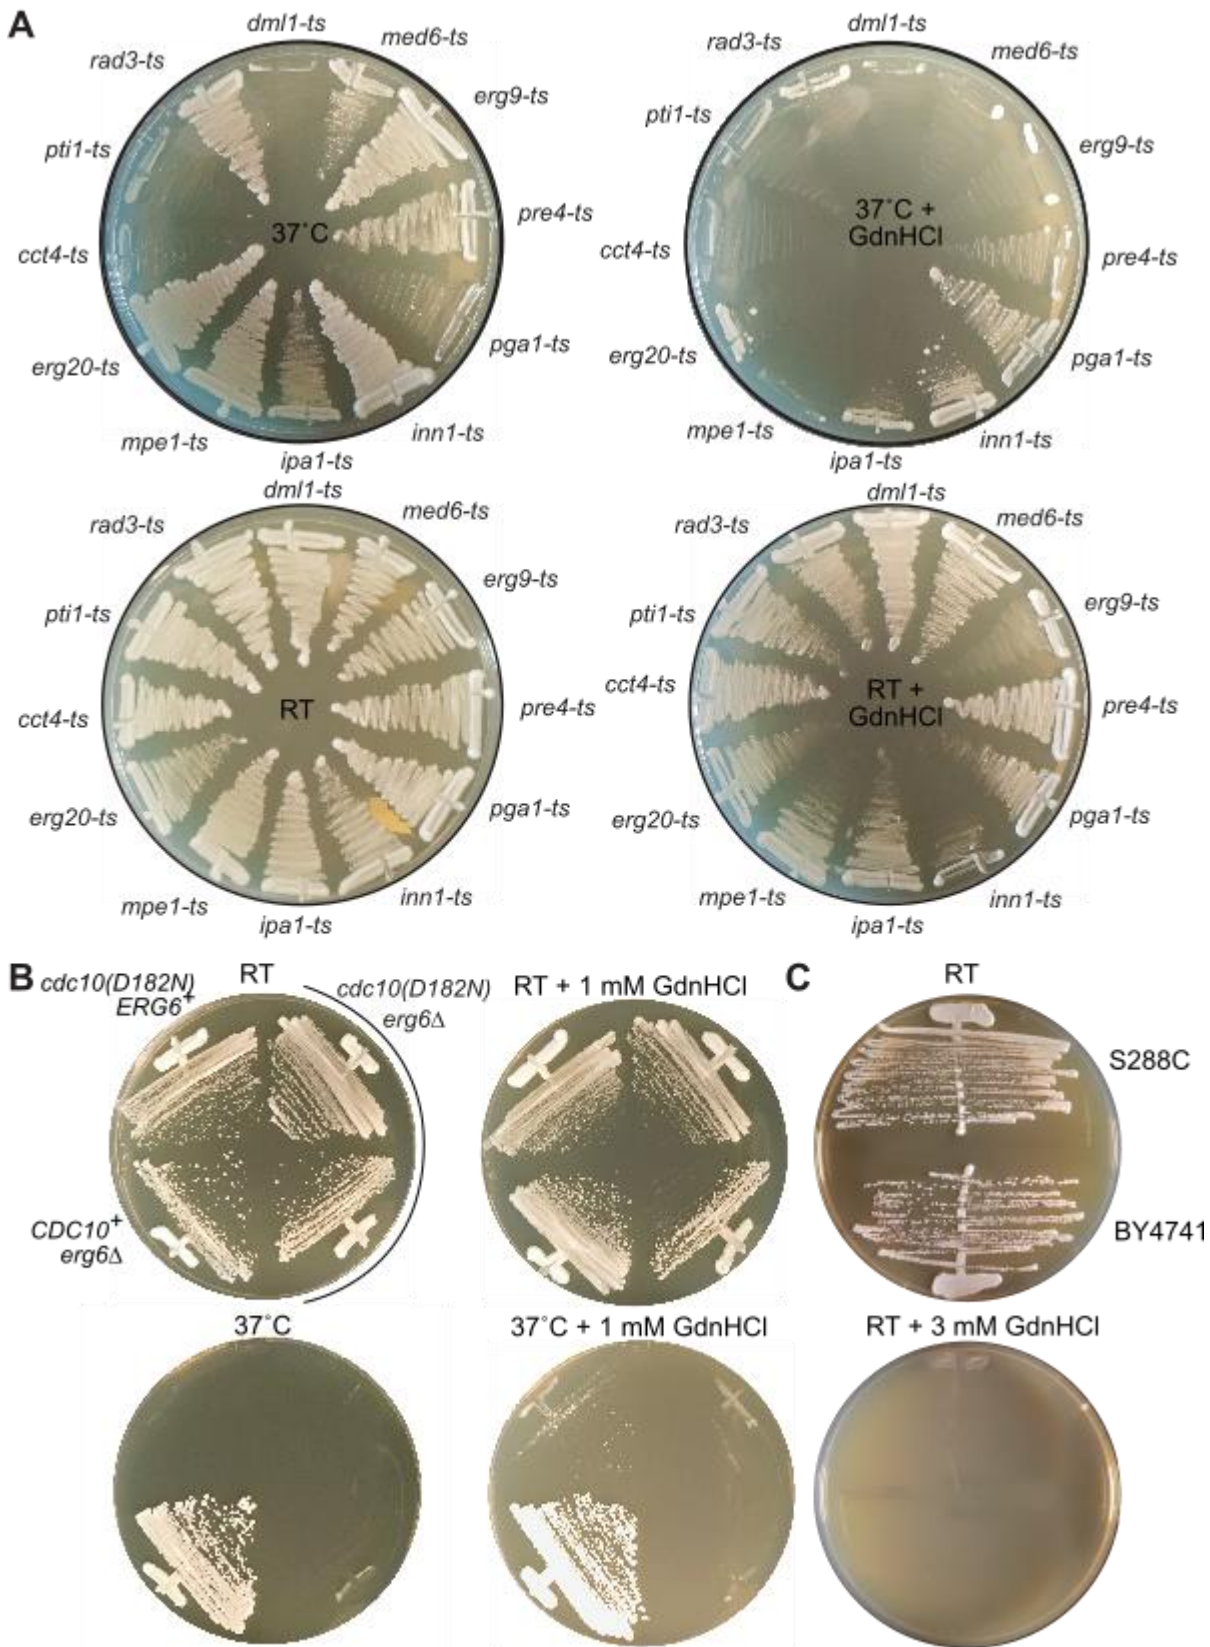

**Figure S4. GdnHCl sensitivity in WT, TS, and *erg6Δ* mutants.** (A) Rich (YPD) plates with or without 3 mM GdnHCl were streaked with TS mutant strains of the indicated genotypes from the Hieter TS collection and incubated at room temperature ("RT") or 37°C. (B) Rich (YPD) media plates with or without 1 mM GdnHCl were streaked with CBY06147 ("*cdc10(D182N) ERG6+*"), H06534 ("*CDC10+ erg6Δ*"), and H06537 and another *cdc10(D182N) erg6Δ* haploid clone from the same cross that was not saved as a freezer stock. The plates were

then incubated at the indicated temperatures. 1 mM GdnHCl provides only partial rescue of the TS phenotype of *cdc10(D182N) ERG6<sup>+</sup>* cells. (C) S288C, a prototrophic WT strain, and BY4741, a strain auxotrophic for histidine, leucine, methionine and uracil but otherwise WT, were streaked to rich (YPD) medium with or without 3 mM GdnHCl and incubated at room temperature ("RT").
