# Supplementary material
Source: publisher figshare collection journal article supplement (https://gsajournals.figshare.com/articles/dataset/_/14773530)
Supplement: Supplementary file 5 [file 1]

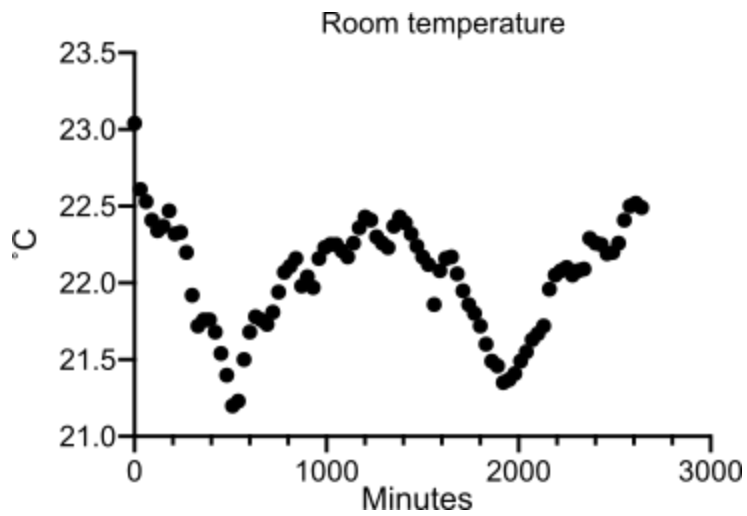

**Figure S3. Defining room temperature.** Temperature over a nearly 48-hour period was recorded at the location where the majority of the room temperature incubation steps were performed using a CellASIC ONIX™ temperature calibration plate and DirecTemp™ temperature monitoring software.
