# Supplementary material
Source: publisher figshare collection journal article supplement (https://gsajournals.figshare.com/articles/dataset/_/14773530)
Supplement: Supplementary file 6 [file 1]

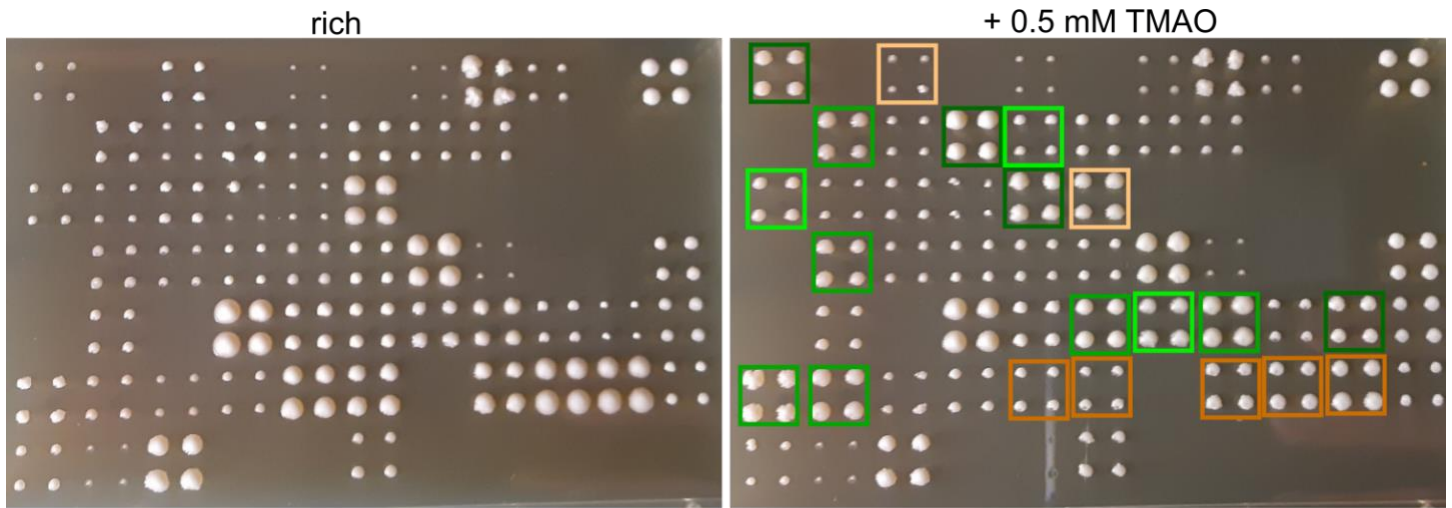

- |                                                                                                 |                                                                                                      |
|-------------------------------------------------------------------------------------------------|------------------------------------------------------------------------------------------------------|
|  Large Rescue  |  Medium Sensitivity |
|  Medium Rescue |  Small Sensitivity  |
|  Small Rescue  |                                                                                                      |

**Figure S9. Examples of TMAO rescue.** Plate 5A of the Boone collection was pinned in quadruplicate to rich (YPD) medium with or without 0.5 mM TMAO and the plates were incubated at 37°C prior to imaging.
