# Supplementary material
Source: publisher figshare collection journal article supplement (https://gsajournals.figshare.com/articles/dataset/_/14773530)
Supplement: Supplementary file 7 [file 1]

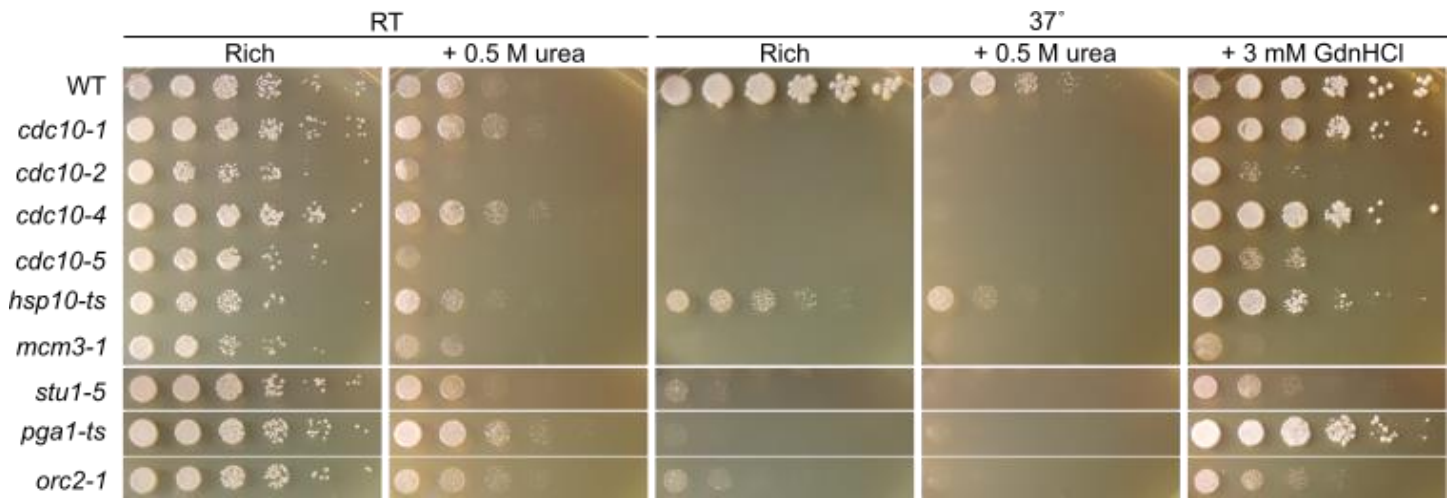

**Figure S6. Failure of urea to rescue TS mutants (part II).** Selected TS mutants that were rescued by 3 mM GdnHCl were serially diluted and spotted on rich (YPD) medium with or without 3mM GdnHCl or 0.5 M urea and incubated at the indicated temperatures for 3 days. "WT", BY4741. White horizontal lines between rows indicate where photos were cropped from other plates or other parts of the same plate.
