# Supplementary material
Source: publisher figshare collection journal article supplement (https://gsajournals.figshare.com/articles/dataset/_/14773530)
Supplement: Supplementary file 8 [file 1]

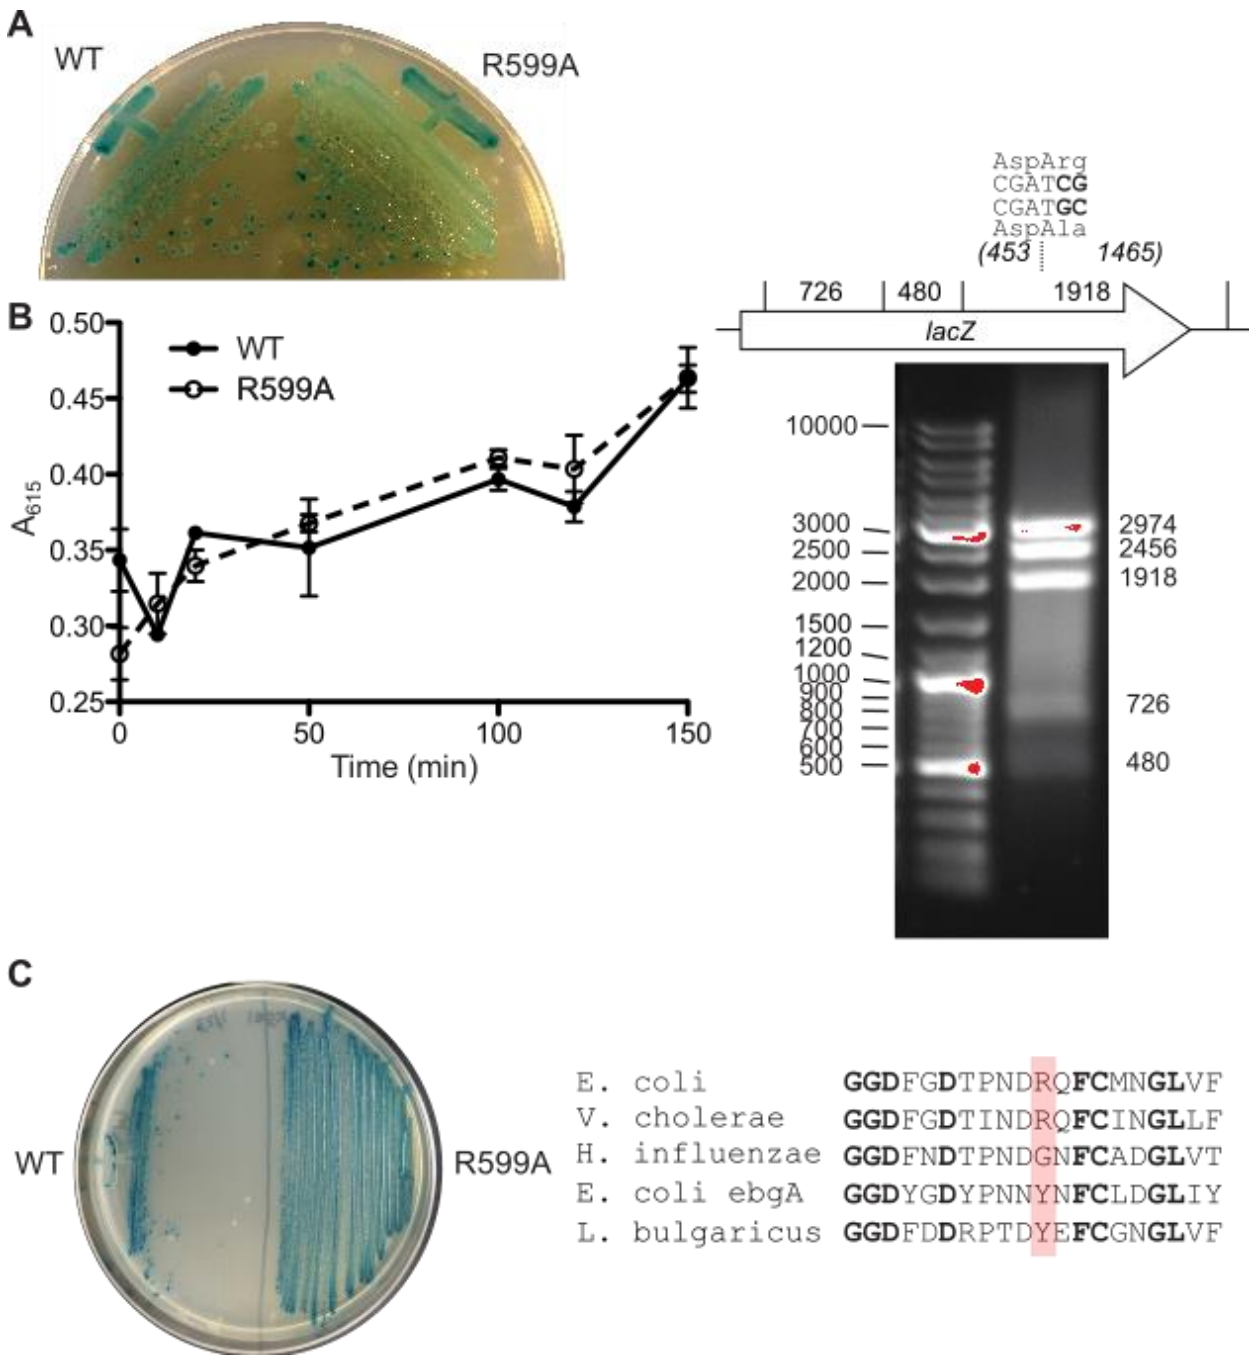

**Figure S2. Arg 599 in *E. coli*  $\beta$ -gal is dispensable for activity *in vivo*.** (A) *E. coli* cells of strain DH5 $\alpha$ , carrying the *lacZ* $\Delta$ M15 allele at the endogenous locus, were transformed with plasmids carrying WT *lacZ* or the R599A mutant allele under control of the yeast *ACT1* promoter and streaked on medium containing the chromogenic  $\beta$ -gal substrate X-gal at 32  $\mu$ g/mL. Plates were incubated overnight at 37°C prior to imaging. (B) *Left*,  $\beta$ -gal activity in cells as in (A) but grown in liquid culture selective for the plasmids, and then lysed at the indicated timepoints following the addition of X-gal and chloramphenicol (to halt new translation). Cleaved X-gal at each timepoint was measured in triplicate by absorbance at 615 nm (" $A_{615}$ ") after the indicated times following X-gal addition. Points show the mean, error bars are standard error of the mean. *Right*, plasmid was isolated from the remainder of the R599A culture and digested with *PvuI* before separation by agarose gel electrophoresis. Band sizes are shown in basepairs. Red color indicates saturated pixels. The *PvuI* recognition site overlapping with the Arg 599 codon is shown with a map (not to scale) of *PvuI* sites in *lacZ*. DNA ladder was Thermo Scientific GeneRuler DNA Ladder Mix (#SM0331). (C) *Left*, as in (A) but with the *E. coli* strain RS302, which carries the  $\Delta$ (*lacI*POZ)C29 allele at the endogenous locus, and with X-gal at 200  $\mu$ g/mL. *Right*, protein sequence alignment of a portion of the indicated  $\beta$ -gal homologs, with *E. coli* Arg 599 highlighted in red and identical residues in bold.
